# Supplementary material for: Study on the Alkylation Reactions of N(7)-Unsubstituted 1,3-Diazaoxindoles
Source: MDPI journal article supplement (doi:10.3390/molecules22050846), 2017-05-19
Supplement: s1 [file s1]

**115919**

**MOE0183\_1B**

Submitted by: Kokai Eszter  
Operator: Dancso Andras

# X-ray Structure Report

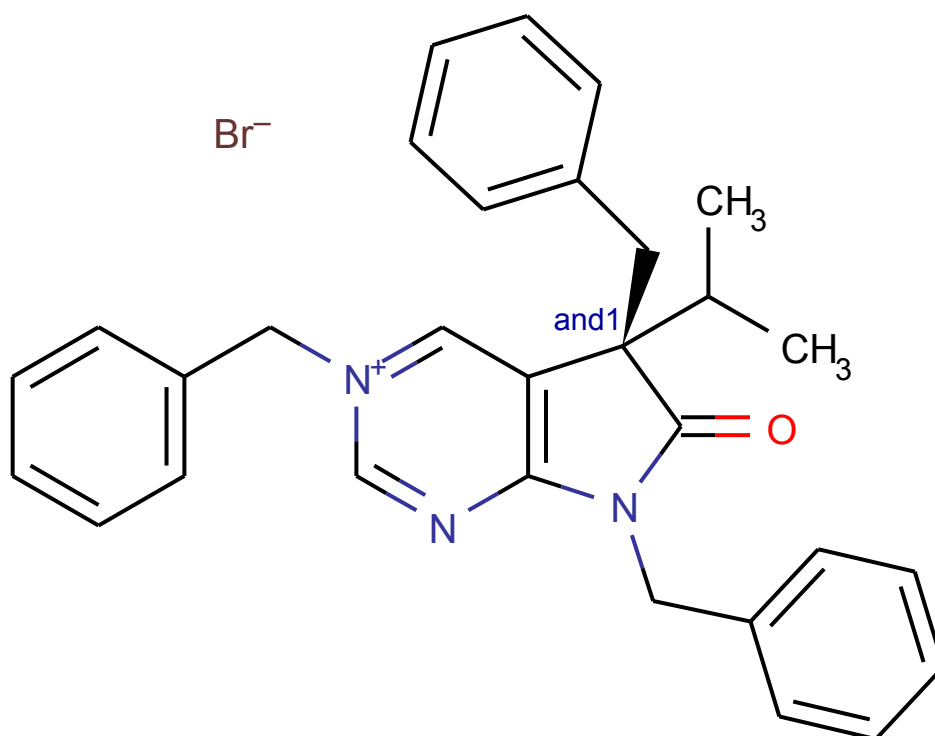

January 4, 2017

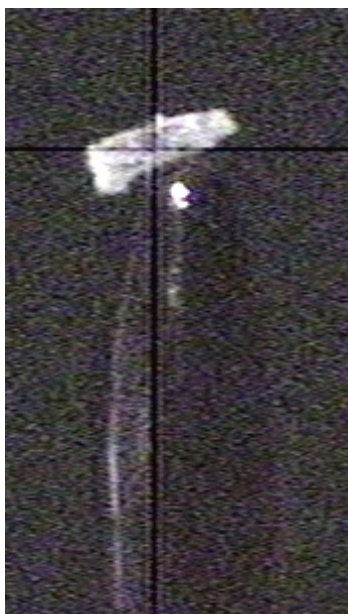

Fig. 1. The crystal

- 3 -

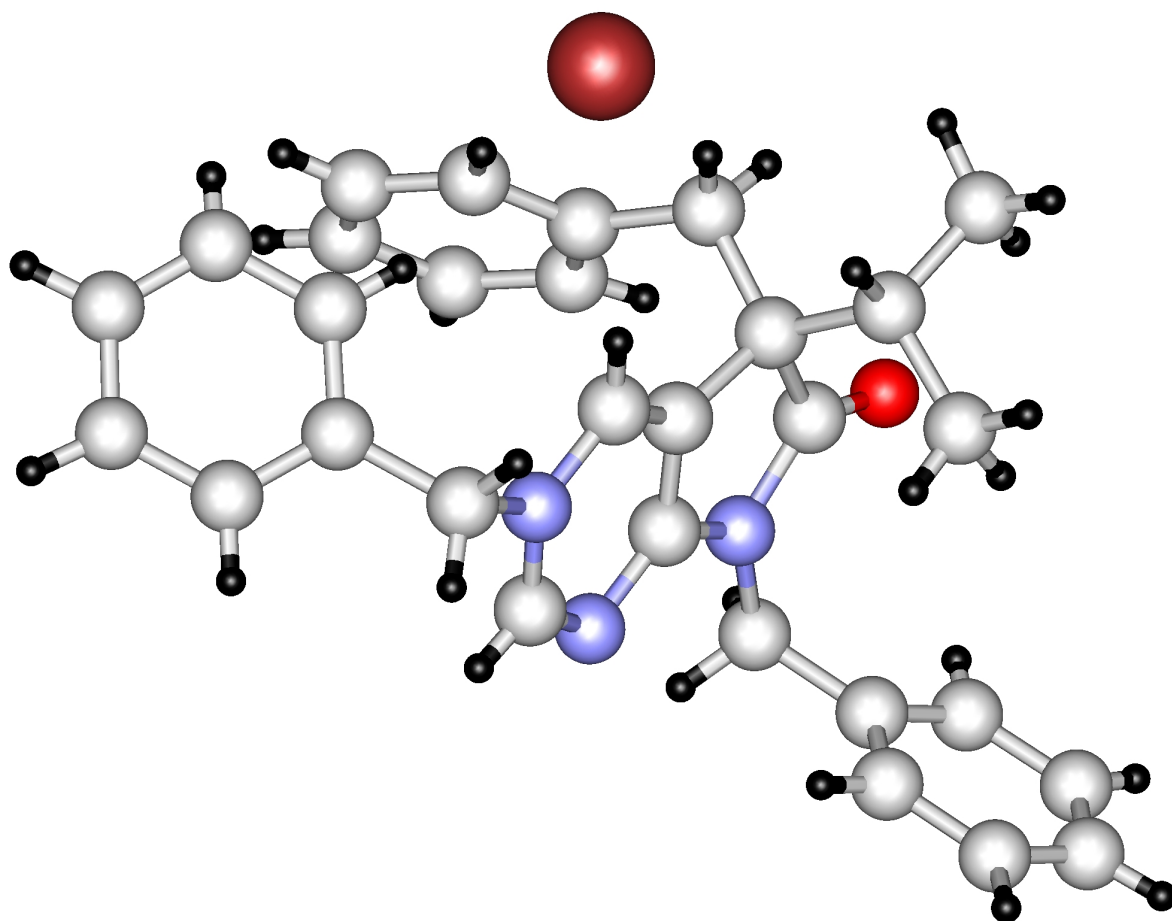

Fig. 2. The molecule

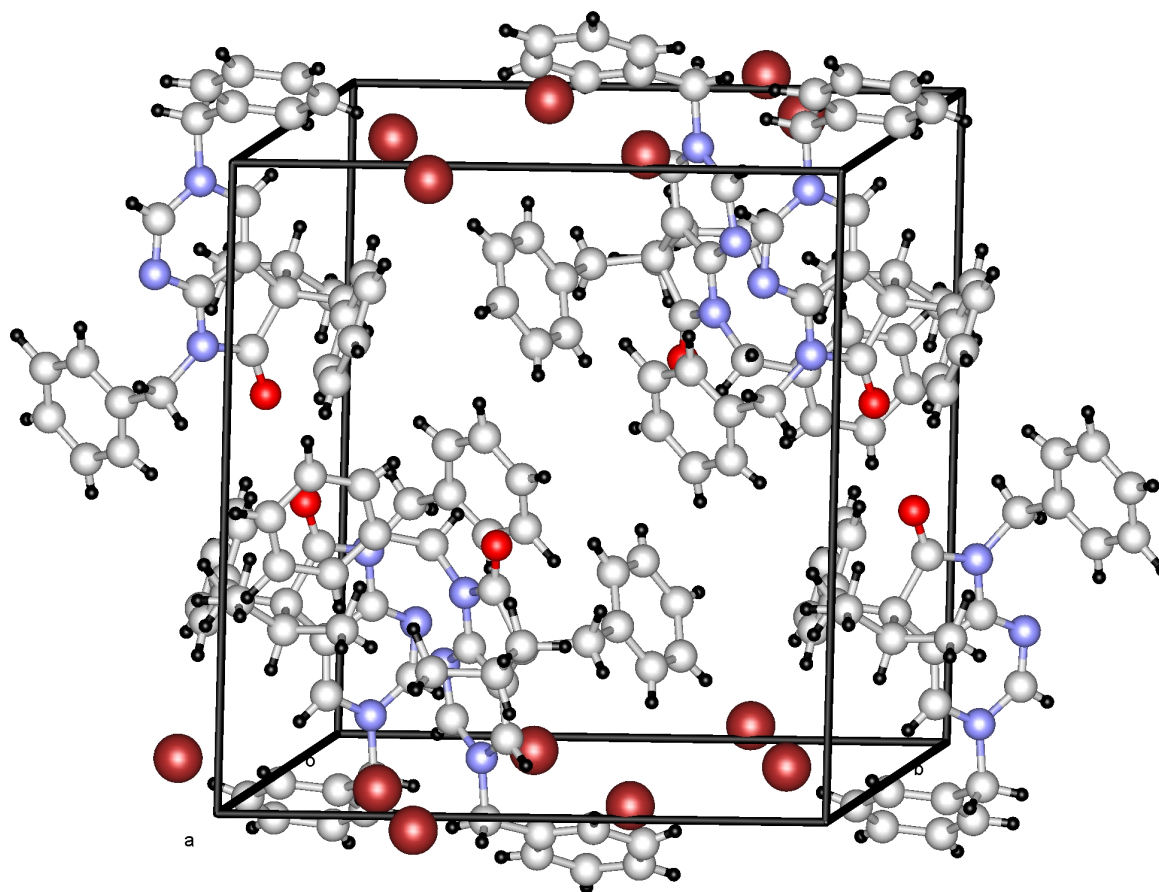

Fig. 3. Packing

## *Experimental*

### Data Collection

A colorless chunk crystal of  $C_{30}H_{30}N_3OBr$  having approximate dimensions of 0.21 x 0.18 x 0.07 mm was mounted on a cactus needle. All measurements were made on a Rigaku RAXIS RAPID imaging plate area detector with graphite monochromated Cu-K $\alpha$  radiation.

Indexing was performed from 4 oscillations that were exposed for 300 seconds. The crystal-to-detector distance was 127.40 mm.

Cell constants and an orientation matrix for data collection corresponded to a primitive monoclinic cell with dimensions:

$$\begin{aligned}a &= 12.4631(3) \text{ \AA} \\b &= 14.3905(3) \text{ \AA} \quad \beta = 101.1422(10)^\circ \\c &= 15.0183(4) \text{ \AA} \\V &= 2642.76(11) \text{ \AA}^3\end{aligned}$$

For  $Z = 4$  and F.W. = 528.49, the calculated density is 1.328 g/cm<sup>3</sup>. The systematic absences of:

$$\begin{aligned}h0l: h \pm 2n \\0k0: k \pm 2n\end{aligned}$$

uniquely determine the space group to be:

$$P2_1/a \text{ (\#14)}$$

The data were collected at a temperature of  $20 \pm 1^\circ\text{C}$  to a maximum  $2\theta$  value of  $143.4^\circ$ . A total of 180 oscillation images were collected. A sweep of data was done using  $\omega$  scans from  $20.0$  to  $200.0^\circ$  in  $5.0^\circ$  step, at  $\chi=0.0^\circ$  and  $\phi = 0.0^\circ$ . The exposure rate was 60.0 [sec./ $^\circ$ ]. A second sweep was performed using  $\omega$  scans from  $20.0$  to  $200.0^\circ$  in  $5.0^\circ$  step, at  $\chi=54.0^\circ$  and  $\phi = 0.0^\circ$ . The exposure rate was 60.0 [sec./ $^\circ$ ]. Another sweep was performed using  $\omega$  scans from  $20.0$  to  $200.0^\circ$  in  $5.0^\circ$  step, at  $\chi=54.0^\circ$  and  $\phi = 90.0^\circ$ . The exposure rate was 60.0 [sec./ $^\circ$ ]. Another sweep was performed using  $\omega$  scans from  $20.0$  to  $200.0^\circ$  in  $5.0^\circ$  step, at  $\chi=54.0^\circ$  and  $\phi = 180.0^\circ$ . The exposure rate was 60.0 [sec./ $^\circ$ ]. Another sweep was performed using  $\omega$  scans from  $20.0$  to  $200.0^\circ$  in  $5.0^\circ$  step, at  $\chi=54.0^\circ$  and  $\phi = 270.0^\circ$ . The exposure rate was 60.0 [sec./ $^\circ$ ]. The crystal-to-detector distance was 127.40 mm. Readout was performed in the 0.100 mm pixel mode.

## Data Reduction

Of the 30134 reflections that were collected, 4971 were unique ( $R_{\text{int}} = 0.100$ ).

The linear absorption coefficient,  $\mu$ , for Cu-K $\alpha$  radiation is 23.234 cm<sup>-1</sup>. An empirical absorption correction was applied which resulted in transmission factors ranging from 0.712 to 0.860. The data were corrected for Lorentz and polarization effects.

## Structure Solution and Refinement

The structure was solved by direct methods<sup>1</sup> and expanded using Fourier techniques<sup>2</sup>. The non-hydrogen atoms were refined anisotropically. Hydrogen atoms were refined isotropically. The final cycle of full-matrix least-squares refinement<sup>3</sup> on F was based on 13267 observed reflections ( $I > 2.00\sigma(I)$ ) and 436 variable parameters and converged (largest parameter shift was 0.00 times its esd) with unweighted and weighted agreement factors of:

$$R = \sum ||F_o| - |F_c|| / \sum |F_o| = 0.0423$$

$$R_w = [ \sum w (|F_o| - |F_c|)^2 / \sum w F_o^2 ]^{1/2} = 0.0511$$

The standard deviation of an observation of unit weight<sup>4</sup> was 1.77. Unit weights were used. Plots of  $\sum w (|F_o| - |F_c|)^2$  versus  $|F_o|$ , reflection order in data collection,  $\sin \theta/\lambda$  and various classes of indices showed no unusual trends. The maximum and minimum peaks on the final difference Fourier map corresponded to 2.94 and -1.65 e<sup>-</sup>/Å<sup>3</sup>, respectively.

Neutral atom scattering factors were taken from Cromer and Waber<sup>5</sup>. Anomalous dispersion effects were included in Fcalc<sup>6</sup>; the values for  $\Delta f'$  and  $\Delta f''$  were those of Creagh and McAuley<sup>7</sup>. The values for the mass attenuation coefficients are those of Creagh and Hubbell<sup>8</sup>. All calculations were performed using the CrystalStructure<sup>9,10</sup> crystallographic software package.

## *References*

- (1) SIR92: Altomare, A., Cascarano, G., Giacovazzo, C., Guagliardi, A., Burla, M., Polidori, G., and Camalli, M. (1994) J. Appl. Cryst., 27, 435.
- (2) DIRDIF99: Beurskens, P.T., Admiraal, G., Beurskens, G., Bosman, W.P., de Gelder, R., Israel, R. and Smits, J.M.M.(1999). The DIRDIF-99 program system, Technical Report of the Crystallography Laboratory, University of Nijmegen, The Netherlands.

(3) Least Squares function minimized:

$$\sum w(|F_o| - |F_c|)^2 \quad \text{where } w = \text{Least Squares weights.}$$

(4) Standard deviation of an observation of unit weight:

$$[\sum w(|F_o| - |F_c|)^2 / (N_o - N_v)]^{1/2}$$

where:  $N_o$  = number of observations

$N_v$  = number of variables

(5) Cromer, D. T. & Waber, J. T.; "International Tables for X-ray Crystallography", Vol. IV, The Kynoch Press, Birmingham, England, Table 2.2 A (1974).

(6) Ibers, J. A. & Hamilton, W. C.; Acta Crystallogr., 17, 781 (1964).

(7) Creagh, D. C. & McAuley, W.J. .; "International Tables for Crystallography", Vol C, (A.J.C. Wilson, ed.), Kluwer Academic Publishers, Boston, Table 4.2.6.8, pages 219-222 (1992).

(8) Creagh, D. C. & Hubbell, J.H.; "International Tables for Crystallography", Vol C, (A.J.C. Wilson, ed.), Kluwer Academic Publishers, Boston, Table 4.2.4.3, pages 200-206 (1992).

(9) CrystalStructure 3.7.0: Crystal Structure Analysis Package, Rigaku and Rigaku/MSK (2000-2005). 9009 New Trails Dr. The Woodlands TX 77381 USA.

(10) CRYSTALS Issue 10: Watkin, D.J., Prout, C.K. Carruthers, J.R. & Betteridge, P.W. Chemical Crystallography Laboratory, Oxford, UK. (1996)

## EXPERIMENTAL DETAILS

### A. Crystal Data

|                         |                                                                                                                                                                 |
|-------------------------|-----------------------------------------------------------------------------------------------------------------------------------------------------------------|
| Empirical Formula       | $\text{C}_{30}\text{H}_{30}\text{N}_3\text{OBr}$                                                                                                                |
| Formula Weight          | 528.49                                                                                                                                                          |
| Crystal Color, Habit    | colorless, chunk                                                                                                                                                |
| Crystal Dimensions      | 0.21 X 0.18 X 0.07 mm                                                                                                                                           |
| Crystal System          | monoclinic                                                                                                                                                      |
| Lattice Type            | Primitive                                                                                                                                                       |
| Indexing Images         | 4 oscillations @ 300.0 seconds                                                                                                                                  |
| Detector Position       | 127.40 mm                                                                                                                                                       |
| Pixel Size              | 0.100 mm                                                                                                                                                        |
| Lattice Parameters      | $a = 12.4631(3) \text{ \AA}$<br>$b = 14.3905(3) \text{ \AA}$<br>$c = 15.0183(4) \text{ \AA}$<br>$\beta = 101.1422(10)^\circ$<br>$V = 2642.76(11) \text{ \AA}^3$ |
| Space Group             | $P2_1/a$ (#14)                                                                                                                                                  |
| Z value                 | 4                                                                                                                                                               |
| D <sub>calc</sub>       | 1.328 g/cm <sup>3</sup>                                                                                                                                         |
| F <sub>000</sub>        | 1096.00                                                                                                                                                         |
| $\mu(\text{CuK}\alpha)$ | 23.234 cm <sup>-1</sup>                                                                                                                                         |



## B. Intensity Measurements

|                                                           |                                                                       |
|-----------------------------------------------------------|-----------------------------------------------------------------------|
| Diffractometer                                            | Rigaku RAXIS-RAPID                                                    |
| Radiation                                                 | CuK $\alpha$ ( $\lambda$ = 1.54187 Å)<br>graphite monochromated       |
| Detector Aperture                                         | 280 mm x 256 mm                                                       |
| Data Images                                               | 180 exposures                                                         |
| $\omega$ oscillation Range ( $\chi$ =0.0, $\phi$ =0.0)    | 20.0 - 200.0 $^{\circ}$                                               |
| Exposure Rate                                             | 60.0 sec./ $^{\circ}$                                                 |
| $\omega$ oscillation Range ( $\chi$ =54.0, $\phi$ =0.0)   | 20.0 - 200.0 $^{\circ}$                                               |
| Exposure Rate                                             | 60.0 sec./ $^{\circ}$                                                 |
| $\omega$ oscillation Range ( $\chi$ =54.0, $\phi$ =90.0)  | 20.0 - 200.0 $^{\circ}$                                               |
| Exposure Rate                                             | 60.0 sec./ $^{\circ}$                                                 |
| $\omega$ oscillation Range ( $\chi$ =54.0, $\phi$ =180.0) | 20.0 - 200.0 $^{\circ}$                                               |
| Exposure Rate                                             | 60.0 sec./ $^{\circ}$                                                 |
| $\omega$ oscillation Range ( $\chi$ =54.0, $\phi$ =270.0) | 20.0 - 200.0 $^{\circ}$                                               |
| Exposure Rate                                             | 60.0 sec./ $^{\circ}$                                                 |
| Detector Position                                         | 127.40 mm                                                             |
| Pixel Size                                                | 0.100 mm                                                              |
| $2\theta_{\text{max}}$                                    | 143.4 $^{\circ}$                                                      |
| No. of Reflections Measured                               | Total: 30134<br>Unique: 4971 ( $R_{\text{int}}$ = 0.100)              |
| Corrections                                               | Lorentz-polarization<br>Absorption<br>(trans. factors: 0.712 - 0.860) |

### C. Structure Solution and Refinement

|                                          |                                |
|------------------------------------------|--------------------------------|
| Structure Solution                       | Direct Methods (SIR92)         |
| Refinement                               | Full-matrix least-squares on F |
| Function Minimized                       | $\Sigma w ( Fo  -  Fc )^2$     |
| Least Squares Weights                    | 1                              |
| $2\theta_{\text{max}}$ cutoff            | 143.4 $^{\circ}$               |
| Anomalous Dispersion                     | All non-hydrogen atoms         |
| No. Observations ( $I > 2.00\sigma(I)$ ) | 13267                          |
| No. Variables                            | 436                            |
| Reflection/Parameter Ratio               | 30.43                          |
| Residuals: R ( $I > 2.00\sigma(I)$ )     | 0.0423                         |
| Residuals: Rw ( $I > 2.00\sigma(I)$ )    | 0.0511                         |
| Goodness of Fit Indicator                | 1.770                          |
| Max Shift/Error in Final Cycle           | 0.000                          |
| Maximum peak in Final Diff. Map          | 2.94 e $^{-}/\text{\AA}^3$     |
| Minimum peak in Final Diff. Map          | -1.65 e $^{-}/\text{\AA}^3$    |

Table 1. Atomic coordinates and B<sub>iso</sub>/B<sub>eq</sub>

| atom  | x          | y           | z           | B <sub>eq</sub> |
|-------|------------|-------------|-------------|-----------------|
| Br(1) | 0.46594(3) | -0.17103(3) | 0.01709(3)  | 4.765(11)       |
| O(1)  | 0.5435(2)  | 0.04326(18) | 0.42324(19) | 5.62(9)         |
| N(1)  | 0.2889(2)  | 0.1093(2)   | 0.0650(2)   | 3.78(10)        |
| N(2)  | 0.2748(2)  | 0.1774(2)   | 0.2070(2)   | 5.22(11)        |
| N(3)  | 0.4026(2)  | 0.1210(2)   | 0.3323(2)   | 4.44(11)        |
| C(6)  | 0.4701(4)  | -0.0972(3)  | 0.2689(3)   | 4.15(14)        |
| C(7)  | 0.1632(3)  | 0.0348(3)   | -0.0660(2)  | 4.13(12)        |
| C(8)  | 0.4054(2)  | 0.0557(2)   | 0.1952(3)   | 2.92(11)        |
| C(9)  | 0.3566(3)  | 0.1205(2)   | 0.2427(3)   | 3.82(13)        |
| C(10) | 0.2884(4)  | -0.1664(3)  | 0.2074(4)   | 5.16(15)        |
| C(11) | 0.2465(3)  | 0.1678(3)   | 0.1188(4)   | 4.95(14)        |
| C(12) | 0.3563(3)  | -0.1220(2)  | 0.2782(3)   | 3.91(12)        |
| C(13) | 0.6082(3)  | 0.0252(3)   | 0.2347(3)   | 4.32(14)        |
| C(14) | 0.3171(4)  | -0.1053(3)  | 0.3566(4)   | 5.21(16)        |
| C(15) | 0.3721(3)  | 0.0522(2)   | 0.1058(3)   | 3.66(13)        |
| C(16) | 0.3750(4)  | 0.1824(4)   | 0.4018(4)   | 5.53(17)        |
| C(17) | 0.1850(4)  | -0.1935(3)  | 0.2127(4)   | 6.14(18)        |
| C(18) | 0.4949(3)  | 0.0067(2)   | 0.2598(2)   | 3.56(12)        |
| C(19) | 0.0107(4)  | -0.0997(4)  | -0.1295(3)  | 6.27(17)        |
| C(20) | 0.2126(5)  | -0.1333(3)  | 0.3614(4)   | 6.5(2)          |
| C(21) | 0.7011(4)  | -0.0324(5)  | 0.2893(5)   | 6.4(2)          |
| C(22) | 0.4881(3)  | 0.0565(2)   | 0.3490(3)   | 4.28(14)        |
| C(23) | 0.5930(5)  | 0.4076(4)   | 0.4688(6)   | 8.7(2)          |
| C(24) | 0.4511(3)  | 0.2619(3)   | 0.4270(4)   | 4.58(14)        |
| C(25) | 0.6376(4)  | 0.1269(4)   | 0.2394(5)   | 5.77(18)        |
| C(26) | 0.1861(4)  | -0.0573(3)  | -0.0537(3)  | 6.75(16)        |
| C(27) | 0.2474(4)  | 0.1090(3)   | -0.0358(3)  | 4.73(16)        |
| C(28) | -0.0155(4) | -0.0080(4)  | -0.1424(3)  | 7.29(18)        |
| C(29) | 0.0614(4)  | 0.0589(3)   | -0.1100(3)  | 6.40(16)        |
| C(30) | 0.1455(4)  | -0.1775(3)  | 0.2899(4)   | 6.08(17)        |
| C(31) | 0.5149(5)  | 0.2703(4)   | 0.5101(4)   | 7.9(2)          |
| C(32) | 0.4588(5)  | 0.3289(5)   | 0.3660(4)   | 8.9(2)          |
| C(33) | 0.1102(5)  | -0.1241(4)  | -0.0858(4)  | 6.90(19)        |
| C(34) | 0.5293(6)  | 0.4027(5)   | 0.3861(5)   | 10.2(2)         |
| C(35) | 0.5868(5)  | 0.3437(5)   | 0.5320(5)   | 9.6(2)          |
| H(1)  | 0.045(2)   | 0.121(2)    | -0.118(2)   | 5.1(11)         |
| H(2)  | -0.046(2)  | -0.146(2)   | -0.152(2)   | 5.1(10)         |

Table 1. Atomic coordinates and B<sub>iso</sub>/B<sub>eq</sub> (continued)

| atom  | x          | y           | z          | B <sub>eq</sub> |
|-------|------------|-------------|------------|-----------------|
| H(3)  | 0.220(2)   | 0.168(2)    | -0.051(2)  | 6.5(12)         |
| H(4)  | 0.310(2)   | 0.101(2)    | -0.062(2)  | 3.9(10)         |
| H(5)  | 0.4005(19) | 0.0145(16)  | 0.0680(18) | 1.1(7)          |
| H(6)  | 0.1938(17) | 0.2016(15)  | 0.0888(16) | 0.2(6)          |
| H(7)  | 0.301(2)   | 0.2037(18)  | 0.3845(19) | 2.6(9)          |
| H(8)  | 0.359(2)   | 0.1447(18)  | 0.4472(19) | 2.2(9)          |
| H(9)  | 0.588(2)   | 0.165(2)    | 0.207(2)   | 5.5(12)         |
| H(10) | 0.647(3)   | 0.156(2)    | 0.306(2)   | 10.9(18)        |
| H(11) | 0.703(2)   | 0.139(2)    | 0.220(2)   | 4.9(11)         |
| H(12) | 0.766(2)   | -0.016(2)   | 0.274(2)   | 6.9(14)         |
| H(13) | 0.709(2)   | -0.014(2)   | 0.355(2)   | 6.3(15)         |
| H(14) | 0.601(2)   | 0.0047(19)  | 0.1724(19) | 2.8(10)         |
| H(15) | 0.689(3)   | -0.101(2)   | 0.288(3)   | 11.7(20)        |
| H(16) | 0.492(2)   | -0.1261(18) | 0.2243(18) | 1.4(8)          |
| H(17) | 0.521(2)   | -0.1253(16) | 0.3216(17) | 2.1(7)          |
| H(18) | 0.312(2)   | -0.172(2)   | 0.157(2)   | 4.2(12)         |
| H(19) | 0.138(2)   | -0.226(2)   | 0.170(2)   | 5.2(12)         |
| H(20) | 0.073(2)   | -0.1982(19) | 0.297(2)   | 3.9(9)          |
| H(21) | 0.364(3)   | -0.082(2)   | 0.406(2)   | 7.6(16)         |
| H(22) | 0.188(2)   | -0.125(2)   | 0.406(2)   | 2.4(11)         |
| H(23) | -0.087(3)  | 0.005(2)    | -0.178(3)  | 12.4(19)        |
| H(24) | 0.253(2)   | -0.072(2)   | -0.029(2)  | 3.4(9)          |
| H(25) | 0.119(3)   | -0.178(2)   | -0.065(3)  | 7.9(18)         |
| H(26) | 0.414(3)   | 0.325(2)    | 0.309(2)   | 8.0(14)         |
| H(27) | 0.513(2)   | 0.222(2)    | 0.544(2)   | 4.7(12)         |
| H(28) | 0.628(3)   | 0.342(3)    | 0.589(3)   | 10.4(18)        |
| H(29) | 0.644(3)   | 0.454(2)    | 0.479(2)   | 8.8(16)         |
| H(30) | 0.536(4)   | 0.453(3)    | 0.337(3)   | 16.0(24)        |

$$B_{eq} = 8/3 \pi^2 (U_{11}(aa^*)^2 + U_{22}(bb^*)^2 + U_{33}(cc^*)^2 + 2U_{12}(aa^*bb^*)\cos \gamma + 2U_{13}(aa^*cc^*)\cos \beta + 2U_{23}(bb^*cc^*)\cos \alpha)$$

Table 2. Anisotropic displacement parameters

| atom  | U <sub>11</sub> | U <sub>22</sub> | U <sub>33</sub> | U <sub>12</sub> | U <sub>13</sub> | U <sub>23</sub> |
|-------|-----------------|-----------------|-----------------|-----------------|-----------------|-----------------|
| Br(1) | 0.0538(2)       | 0.0563(2)       | 0.0685(3)       | 0.0004(2)       | 0.0058(2)       | -0.0028(3)      |
| O(1)  | 0.087(2)        | 0.072(2)        | 0.046(2)        | -0.0034(17)     | -0.0066(18)     | 0.0088(17)      |
| N(1)  | 0.046(2)        | 0.045(2)        | 0.050(3)        | -0.0063(17)     | 0.002(2)        | 0.006(2)        |
| N(2)  | 0.067(2)        | 0.061(2)        | 0.068(3)        | 0.001(2)        | 0.008(2)        | -0.007(2)       |
| N(3)  | 0.071(2)        | 0.051(2)        | 0.047(3)        | -0.004(2)       | 0.012(2)        | -0.010(2)       |
| C(6)  | 0.066(3)        | 0.041(3)        | 0.044(4)        | 0.012(2)        | -0.004(3)       | 0.003(2)        |
| C(7)  | 0.050(2)        | 0.052(3)        | 0.056(3)        | -0.004(2)       | 0.013(2)        | -0.001(2)       |
| C(8)  | 0.047(2)        | 0.029(2)        | 0.033(3)        | -0.0058(19)     | 0.004(2)        | 0.001(2)        |
| C(9)  | 0.052(3)        | 0.040(2)        | 0.054(4)        | -0.006(2)       | 0.012(2)        | -0.005(2)       |
| C(10) | 0.064(3)        | 0.057(3)        | 0.074(5)        | -0.021(2)       | 0.009(3)        | 0.008(3)        |
| C(11) | 0.040(2)        | 0.046(3)        | 0.098(5)        | 0.015(2)        | 0.003(3)        | 0.011(3)        |
| C(12) | 0.047(3)        | 0.039(2)        | 0.057(4)        | -0.012(2)       | -0.003(2)       | 0.003(2)        |
| C(13) | 0.047(3)        | 0.060(3)        | 0.052(4)        | 0.003(2)        | -0.004(2)       | 0.010(3)        |
| C(14) | 0.078(4)        | 0.069(3)        | 0.052(4)        | -0.016(3)       | 0.014(3)        | 0.001(3)        |
| C(15) | 0.049(2)        | 0.043(2)        | 0.048(4)        | 0.005(2)        | 0.013(2)        | -0.004(2)       |
| C(16) | 0.078(4)        | 0.076(4)        | 0.065(4)        | 0.001(3)        | 0.036(3)        | 0.000(3)        |
| C(17) | 0.078(4)        | 0.066(4)        | 0.086(5)        | -0.024(3)       | 0.007(4)        | -0.008(3)       |
| C(18) | 0.046(2)        | 0.034(2)        | 0.050(3)        | -0.0021(19)     | -0.004(2)       | -0.004(2)       |
| C(19) | 0.050(3)        | 0.083(4)        | 0.103(4)        | -0.022(3)       | 0.008(3)        | -0.014(3)       |
| C(20) | 0.094(5)        | 0.070(4)        | 0.093(6)        | -0.008(3)       | 0.042(5)        | -0.005(4)       |
| C(21) | 0.052(3)        | 0.099(5)        | 0.086(6)        | 0.003(3)        | 0.000(3)        | 0.022(4)        |
| C(22) | 0.061(3)        | 0.035(2)        | 0.064(4)        | -0.014(2)       | 0.006(3)        | 0.016(2)        |
| C(23) | 0.136(6)        | 0.070(4)        | 0.119(8)        | -0.037(4)       | 0.014(5)        | 0.008(5)        |
| C(24) | 0.068(3)        | 0.043(3)        | 0.065(4)        | 0.000(2)        | 0.014(3)        | -0.007(3)       |
| C(25) | 0.060(4)        | 0.067(4)        | 0.090(5)        | -0.018(3)       | 0.007(3)        | 0.019(4)        |
| C(26) | 0.040(3)        | 0.078(4)        | 0.127(5)        | 0.001(3)        | -0.012(3)       | -0.005(3)       |
| C(27) | 0.061(3)        | 0.066(4)        | 0.050(4)        | 0.005(3)        | 0.004(3)        | 0.016(3)        |
| C(28) | 0.065(4)        | 0.081(4)        | 0.112(5)        | -0.014(3)       | -0.031(3)       | 0.003(3)        |
| C(29) | 0.061(3)        | 0.058(3)        | 0.109(4)        | 0.013(3)        | -0.022(3)       | 0.008(3)        |
| C(30) | 0.059(3)        | 0.065(3)        | 0.105(5)        | -0.015(3)       | 0.012(3)        | 0.010(4)        |
| C(31) | 0.139(5)        | 0.084(5)        | 0.058(5)        | -0.001(4)       | -0.028(4)       | 0.011(4)        |
| C(32) | 0.147(5)        | 0.088(4)        | 0.082(5)        | -0.038(4)       | -0.026(4)       | -0.003(5)       |
| C(33) | 0.068(4)        | 0.062(4)        | 0.128(6)        | -0.009(3)       | 0.010(3)        | -0.009(4)       |
| C(34) | 0.197(8)        | 0.100(5)        | 0.072(6)        | -0.038(5)       | -0.017(5)       | 0.011(5)        |
| C(35) | 0.144(6)        | 0.106(6)        | 0.087(6)        | -0.039(4)       | -0.045(4)       | -0.023(5)       |

The general temperature factor expression:  $\exp(-2\pi^2(a^2U_{11}h^2 + b^2U_{22}k^2 + c^2U_{33}l^2 + 2a*b*U_{12}hk + 2a*c*U_{13}hl + 2b*c*U_{23}kl))$

Table 3. Bond lengths (Å)

| atom  | atom  | distance  | atom  | atom  | distance  |
|-------|-------|-----------|-------|-------|-----------|
| O(1)  | C(22) | 1.208(5)  | N(1)  | C(11) | 1.344(7)  |
| N(1)  | C(15) | 1.371(5)  | N(1)  | C(27) | 1.502(6)  |
| N(2)  | C(9)  | 1.336(5)  | N(2)  | C(11) | 1.311(7)  |
| N(3)  | C(9)  | 1.357(6)  | N(3)  | C(16) | 1.458(7)  |
| N(3)  | C(22) | 1.398(5)  | C(6)  | C(12) | 1.494(6)  |
| C(6)  | C(18) | 1.538(5)  | C(6)  | H(16) | 0.88(2)   |
| C(6)  | H(17) | 1.00(2)   | C(7)  | C(26) | 1.360(7)  |
| C(7)  | C(27) | 1.504(6)  | C(7)  | C(29) | 1.358(6)  |
| C(8)  | C(9)  | 1.384(6)  | C(8)  | C(15) | 1.328(6)  |
| C(8)  | C(18) | 1.505(5)  | C(10) | C(12) | 1.381(6)  |
| C(10) | C(17) | 1.363(8)  | C(10) | H(18) | 0.87(3)   |
| C(11) | H(6)  | 0.87(2)   | C(12) | C(14) | 1.381(8)  |
| C(13) | C(18) | 1.554(6)  | C(13) | C(21) | 1.528(7)  |
| C(13) | C(25) | 1.506(7)  | C(13) | H(14) | 0.97(2)   |
| C(14) | C(20) | 1.378(9)  | C(14) | H(21) | 0.91(3)   |
| C(15) | H(5)  | 0.90(2)   | C(16) | C(24) | 1.487(7)  |
| C(16) | H(7)  | 0.95(2)   | C(16) | H(8)  | 0.92(3)   |
| C(17) | C(30) | 1.365(10) | C(17) | H(19) | 0.91(3)   |
| C(18) | C(22) | 1.536(6)  | C(19) | C(28) | 1.364(8)  |
| C(19) | C(33) | 1.333(7)  | C(19) | H(2)  | 0.98(2)   |
| C(20) | C(30) | 1.381(8)  | C(20) | H(22) | 0.80(3)   |
| C(21) | H(12) | 0.91(3)   | C(21) | H(13) | 1.01(3)   |
| C(21) | H(15) | 1.00(4)   | C(23) | C(34) | 1.340(11) |
| C(23) | C(35) | 1.336(11) | C(23) | H(29) | 0.91(4)   |
| C(24) | C(31) | 1.349(8)  | C(24) | C(32) | 1.346(9)  |
| C(25) | H(9)  | 0.89(3)   | C(25) | H(10) | 1.07(4)   |
| C(25) | H(11) | 0.94(3)   | C(26) | C(33) | 1.369(8)  |
| C(26) | H(24) | 0.87(2)   | C(27) | H(3)  | 0.93(3)   |
| C(27) | H(4)  | 0.95(3)   | C(28) | C(29) | 1.380(7)  |
| C(28) | H(23) | 0.96(4)   | C(29) | H(1)  | 0.92(3)   |
| C(30) | H(20) | 0.97(3)   | C(31) | C(35) | 1.383(9)  |
| C(31) | H(27) | 0.87(3)   | C(32) | C(34) | 1.375(10) |
| C(32) | H(26) | 0.94(3)   | C(33) | H(25) | 0.84(3)   |
| C(34) | H(30) | 1.04(5)   | C(35) | H(28) | 0.91(4)   |

Table 4. Bond angles (°)

| atom  | atom  | atom  | angle     | atom  | atom  | atom  | angle     |
|-------|-------|-------|-----------|-------|-------|-------|-----------|
| C(11) | N(1)  | C(15) | 117.2(4)  | C(11) | N(1)  | C(27) | 120.6(3)  |
| C(15) | N(1)  | C(27) | 122.1(4)  | C(9)  | N(2)  | C(11) | 112.1(4)  |
| C(9)  | N(3)  | C(16) | 126.8(3)  | C(9)  | N(3)  | C(22) | 109.6(4)  |
| C(16) | N(3)  | C(22) | 123.4(4)  | C(12) | C(6)  | C(18) | 116.8(3)  |
| C(12) | C(6)  | H(16) | 113.8(17) | C(12) | C(6)  | H(17) | 107.2(16) |
| C(18) | C(6)  | H(16) | 107.1(18) | C(18) | C(6)  | H(17) | 110.9(14) |
| H(16) | C(6)  | H(17) | 100(2)    | C(26) | C(7)  | C(27) | 122.3(4)  |
| C(26) | C(7)  | C(29) | 117.8(4)  | C(27) | C(7)  | C(29) | 119.8(4)  |
| C(9)  | C(8)  | C(15) | 117.7(3)  | C(9)  | C(8)  | C(18) | 109.1(3)  |
| C(15) | C(8)  | C(18) | 133.0(4)  | N(2)  | C(9)  | N(3)  | 122.6(4)  |
| N(2)  | C(9)  | C(8)  | 125.6(4)  | N(3)  | C(9)  | C(8)  | 111.8(3)  |
| C(12) | C(10) | C(17) | 122.3(5)  | C(12) | C(10) | H(18) | 117(2)    |
| C(17) | C(10) | H(18) | 121(2)    | N(1)  | C(11) | N(2)  | 127.9(4)  |
| N(1)  | C(11) | H(6)  | 112.5(17) | N(2)  | C(11) | H(6)  | 119.6(17) |
| C(6)  | C(12) | C(10) | 119.4(4)  | C(6)  | C(12) | C(14) | 122.4(4)  |
| C(10) | C(12) | C(14) | 118.1(4)  | C(18) | C(13) | C(21) | 114.0(4)  |
| C(18) | C(13) | C(25) | 112.3(4)  | C(18) | C(13) | H(14) | 105.6(17) |
| C(21) | C(13) | C(25) | 110.5(4)  | C(21) | C(13) | H(14) | 105.6(16) |
| C(25) | C(13) | H(14) | 108.4(17) | C(12) | C(14) | C(20) | 119.2(5)  |
| C(12) | C(14) | H(21) | 118(2)    | C(20) | C(14) | H(21) | 122(2)    |
| N(1)  | C(15) | C(8)  | 119.4(4)  | N(1)  | C(15) | H(5)  | 115.7(15) |
| C(8)  | C(15) | H(5)  | 125.0(15) | N(3)  | C(16) | C(24) | 115.0(4)  |
| N(3)  | C(16) | H(7)  | 110.4(17) | N(3)  | C(16) | H(8)  | 106.6(18) |
| C(24) | C(16) | H(7)  | 110.7(16) | C(24) | C(16) | H(8)  | 118.8(17) |
| H(7)  | C(16) | H(8)  | 93(2)     | C(10) | C(17) | C(30) | 120.1(5)  |
| C(10) | C(17) | H(19) | 127(2)    | C(30) | C(17) | H(19) | 113(2)    |
| C(6)  | C(18) | C(8)  | 112.1(3)  | C(6)  | C(18) | C(13) | 113.3(3)  |
| C(6)  | C(18) | C(22) | 109.3(3)  | C(8)  | C(18) | C(13) | 111.0(3)  |
| C(8)  | C(18) | C(22) | 100.6(3)  | C(13) | C(18) | C(22) | 109.7(3)  |
| C(28) | C(19) | C(33) | 120.0(5)  | C(28) | C(19) | H(2)  | 117.8(18) |
| C(33) | C(19) | H(2)  | 122.2(18) | C(14) | C(20) | C(30) | 122.0(6)  |
| C(14) | C(20) | H(22) | 121(2)    | C(30) | C(20) | H(22) | 117(2)    |
| C(13) | C(21) | H(12) | 110(2)    | C(13) | C(21) | H(13) | 107(2)    |
| C(13) | C(21) | H(15) | 116(2)    | H(12) | C(21) | H(13) | 105(3)    |
| H(12) | C(21) | H(15) | 112(3)    | H(13) | C(21) | H(15) | 106(3)    |
| O(1)  | C(22) | N(3)  | 123.4(4)  | O(1)  | C(22) | C(18) | 127.8(3)  |
| N(3)  | C(22) | C(18) | 108.8(3)  | C(34) | C(23) | C(35) | 121.2(6)  |

Table 4. Bond angles ( $^{\circ}$ ) (continued)

| atom  | atom  | atom  | angle     | atom  | atom  | atom  | angle     |
|-------|-------|-------|-----------|-------|-------|-------|-----------|
| C(34) | C(23) | H(29) | 118(2)    | C(35) | C(23) | H(29) | 121(2)    |
| C(16) | C(24) | C(31) | 122.5(5)  | C(16) | C(24) | C(32) | 120.2(5)  |
| C(31) | C(24) | C(32) | 117.3(5)  | C(13) | C(25) | H(9)  | 116(2)    |
| C(13) | C(25) | H(10) | 114(2)    | C(13) | C(25) | H(11) | 112.8(19) |
| H(9)  | C(25) | H(10) | 101(3)    | H(9)  | C(25) | H(11) | 105(3)    |
| H(10) | C(25) | H(11) | 106(2)    | C(7)  | C(26) | C(33) | 121.6(4)  |
| C(7)  | C(26) | H(24) | 116.7(19) | C(33) | C(26) | H(24) | 121.4(19) |
| N(1)  | C(27) | C(7)  | 113.0(4)  | N(1)  | C(27) | H(3)  | 106(2)    |
| N(1)  | C(27) | H(4)  | 105.3(18) | C(7)  | C(27) | H(3)  | 111.9(19) |
| C(7)  | C(27) | H(4)  | 112.3(18) | H(3)  | C(27) | H(4)  | 107(2)    |
| C(19) | C(28) | C(29) | 119.6(5)  | C(19) | C(28) | H(23) | 116(2)    |
| C(29) | C(28) | H(23) | 124(2)    | C(7)  | C(29) | C(28) | 120.9(5)  |
| C(7)  | C(29) | H(1)  | 118.3(18) | C(28) | C(29) | H(1)  | 120.8(18) |
| C(17) | C(30) | C(20) | 118.4(5)  | C(17) | C(30) | H(20) | 122.1(18) |
| C(20) | C(30) | H(20) | 119.5(18) | C(24) | C(31) | C(35) | 121.9(6)  |
| C(24) | C(31) | H(27) | 113(2)    | C(35) | C(31) | H(27) | 124(2)    |
| C(24) | C(32) | C(34) | 122.1(6)  | C(24) | C(32) | H(26) | 118(2)    |
| C(34) | C(32) | H(26) | 120(2)    | C(19) | C(33) | C(26) | 120.1(5)  |
| C(19) | C(33) | H(25) | 118(2)    | C(26) | C(33) | H(25) | 119(2)    |
| C(23) | C(34) | C(32) | 118.9(7)  | C(23) | C(34) | H(30) | 120(2)    |
| C(32) | C(34) | H(30) | 121(2)    | C(23) | C(35) | C(31) | 118.7(6)  |
| C(23) | C(35) | H(28) | 126(2)    | C(31) | C(35) | H(28) | 115(2)    |



Table 5. Torsion Angles( $^{\circ}$ )

| atom1 | atom2 | atom3 | atom4 | angle     | atom1 | atom2 | atom3 | atom4 | angle     |
|-------|-------|-------|-------|-----------|-------|-------|-------|-------|-----------|
| C(11) | N(1)  | C(15) | C(8)  | 1.2(6)    | C(15) | N(1)  | C(11) | N(2)  | -0.0(6)   |
| C(11) | N(1)  | C(27) | C(7)  | -96.8(5)  | C(27) | N(1)  | C(11) | N(2)  | -178.8(4) |
| C(15) | N(1)  | C(27) | C(7)  | 84.4(5)   | C(27) | N(1)  | C(15) | C(8)  | -180.0(3) |
| C(9)  | N(2)  | C(11) | N(1)  | 0.4(7)    | C(11) | N(2)  | C(9)  | N(3)  | 177.2(4)  |
| C(11) | N(2)  | C(9)  | C(8)  | -2.2(6)   | C(9)  | N(3)  | C(16) | C(24) | -100.3(5) |
| C(16) | N(3)  | C(9)  | N(2)  | -2.1(7)   | C(16) | N(3)  | C(9)  | C(8)  | 177.4(4)  |
| C(9)  | N(3)  | C(22) | O(1)  | 179.5(4)  | C(9)  | N(3)  | C(22) | C(18) | -2.1(4)   |
| C(22) | N(3)  | C(9)  | N(2)  | -178.0(4) | C(22) | N(3)  | C(9)  | C(8)  | 1.5(5)    |
| C(16) | N(3)  | C(22) | O(1)  | 3.4(7)    | C(16) | N(3)  | C(22) | C(18) | -178.2(4) |
| C(22) | N(3)  | C(16) | C(24) | 75.1(6)   | C(12) | C(6)  | C(18) | C(8)  | -43.9(5)  |
| C(12) | C(6)  | C(18) | C(13) | -170.5(4) | C(12) | C(6)  | C(18) | C(22) | 66.8(5)   |
| C(18) | C(6)  | C(12) | C(10) | 109.8(4)  | C(18) | C(6)  | C(12) | C(14) | -72.7(5)  |
| C(26) | C(7)  | C(27) | N(1)  | -62.0(6)  | C(27) | C(7)  | C(26) | C(33) | -176.5(5) |
| C(26) | C(7)  | C(29) | C(28) | -1.1(8)   | C(29) | C(7)  | C(26) | C(33) | 1.1(8)    |
| C(27) | C(7)  | C(29) | C(28) | 176.7(5)  | C(29) | C(7)  | C(27) | N(1)  | 120.3(5)  |
| C(9)  | C(8)  | C(15) | N(1)  | -2.7(6)   | C(15) | C(8)  | C(9)  | N(2)  | 3.4(6)    |
| C(15) | C(8)  | C(9)  | N(3)  | -176.0(3) | C(9)  | C(8)  | C(18) | C(6)  | 115.0(4)  |
| C(9)  | C(8)  | C(18) | C(13) | -117.2(4) | C(9)  | C(8)  | C(18) | C(22) | -1.0(4)   |
| C(18) | C(8)  | C(9)  | N(2)  | 179.3(4)  | C(18) | C(8)  | C(9)  | N(3)  | -0.2(4)   |
| C(15) | C(8)  | C(18) | C(6)  | -70.0(6)  | C(15) | C(8)  | C(18) | C(13) | 57.9(5)   |
| C(15) | C(8)  | C(18) | C(22) | 174.0(4)  | C(18) | C(8)  | C(15) | N(1)  | -177.4(3) |
| C(12) | C(10) | C(17) | C(30) | -0.3(6)   | C(17) | C(10) | C(12) | C(6)  | 177.9(4)  |
| C(17) | C(10) | C(12) | C(14) | 0.3(5)    | C(6)  | C(12) | C(14) | C(20) | -177.5(4) |
| C(10) | C(12) | C(14) | C(20) | -0.0(6)   | C(21) | C(13) | C(18) | C(6)  | -45.1(5)  |
| C(21) | C(13) | C(18) | C(8)  | -172.3(4) | C(21) | C(13) | C(18) | C(22) | 77.3(5)   |
| C(25) | C(13) | C(18) | C(6)  | -171.7(4) | C(25) | C(13) | C(18) | C(8)  | 61.1(5)   |
| C(25) | C(13) | C(18) | C(22) | -49.2(5)  | C(12) | C(14) | C(20) | C(30) | -0.2(6)   |
| N(3)  | C(16) | C(24) | C(31) | -114.0(6) | N(3)  | C(16) | C(24) | C(32) | 65.8(6)   |
| C(10) | C(17) | C(30) | C(20) | 0.1(6)    | C(6)  | C(18) | C(22) | O(1)  | 62.1(5)   |
| C(6)  | C(18) | C(22) | N(3)  | -116.2(3) | C(8)  | C(18) | C(22) | O(1)  | -179.8(3) |
| C(8)  | C(18) | C(22) | N(3)  | 1.9(4)    | C(13) | C(18) | C(22) | O(1)  | -62.8(5)  |
| C(13) | C(18) | C(22) | N(3)  | 118.9(3)  | C(28) | C(19) | C(33) | C(26) | 0.2(7)    |
| C(33) | C(19) | C(28) | C(29) | -0.1(7)   | C(14) | C(20) | C(30) | C(17) | 0.1(6)    |
| C(34) | C(23) | C(35) | C(31) | 1.6(12)   | C(35) | C(23) | C(34) | C(32) | -1.8(12)  |
| C(16) | C(24) | C(31) | C(35) | 178.7(6)  | C(16) | C(24) | C(32) | C(34) | -178.9(6) |
| C(31) | C(24) | C(32) | C(34) | 0.9(10)   | C(32) | C(24) | C(31) | C(35) | -1.1(9)   |
| C(7)  | C(26) | C(33) | C(19) | -0.7(10)  | C(19) | C(28) | C(29) | C(7)  | 0.6(8)    |

Table 5. Torsion angles ( $^{\circ}$ ) (continued)

| atom1 | atom2 | atom3 | atom4 | angle   | atom1 | atom2 | atom3 | atom4 | angle   |
|-------|-------|-------|-------|---------|-------|-------|-------|-------|---------|
| C(24) | C(31) | C(35) | C(23) | -0.1(8) | C(24) | C(32) | C(34) | C(23) | 0.5(10) |

The sign is positive if when looking from atom 2 to atom 3 a clock-wise motion of atom 1 would superimpose it on atom 4.

Table 6. Distances beyond the asymmetric unit out to 3.60 Å

| atom  | atom                 | distance | atom  | atom                 | distance |
|-------|----------------------|----------|-------|----------------------|----------|
| Br(1) | C(15) <sup>11</sup>  | 3.441(5) | Br(1) | H(1) <sup>21</sup>   | 3.37(3)  |
| Br(1) | H(3) <sup>21</sup>   | 3.38(3)  | Br(1) | H(4) <sup>11</sup>   | 2.92(2)  |
| Br(1) | H(5)                 | 2.94(2)  | Br(1) | H(5) <sup>11</sup>   | 3.21(2)  |
| Br(1) | H(6) <sup>21</sup>   | 2.94(2)  | Br(1) | H(9) <sup>11</sup>   | 3.31(3)  |
| Br(1) | H(16)                | 3.13(2)  | Br(1) | H(18)                | 3.10(3)  |
| Br(1) | H(19) <sup>31</sup>  | 3.19(3)  | Br(1) | H(24)                | 2.98(2)  |
| Br(1) | H(25) <sup>31</sup>  | 3.28(4)  | O(1)  | O(1) <sup>41</sup>   | 3.001(4) |
| O(1)  | C(14) <sup>41</sup>  | 3.540(6) | O(1)  | H(8) <sup>41</sup>   | 3.42(2)  |
| O(1)  | H(21) <sup>41</sup>  | 2.67(3)  | N(1)  | H(2) <sup>51</sup>   | 3.56(3)  |
| N(1)  | H(25) <sup>61</sup>  | 3.26(3)  | N(2)  | C(25) <sup>71</sup>  | 3.379(7) |
| N(2)  | H(2) <sup>51</sup>   | 2.85(2)  | N(2)  | H(9) <sup>71</sup>   | 3.24(3)  |
| N(2)  | H(10) <sup>71</sup>  | 3.37(4)  | N(2)  | H(11) <sup>71</sup>  | 2.80(3)  |
| N(2)  | H(23) <sup>51</sup>  | 3.49(4)  | N(2)  | H(25) <sup>61</sup>  | 3.42(4)  |
| C(6)  | H(20) <sup>31</sup>  | 3.21(2)  | C(6)  | H(27) <sup>41</sup>  | 3.30(3)  |
| C(7)  | H(12) <sup>11</sup>  | 3.42(4)  | C(10) | H(3) <sup>21</sup>   | 3.33(3)  |
| C(10) | H(23) <sup>51</sup>  | 3.39(4)  | C(11) | C(19) <sup>51</sup>  | 3.385(7) |
| C(11) | C(33) <sup>61</sup>  | 3.570(8) | C(11) | H(2) <sup>51</sup>   | 2.66(3)  |
| C(11) | H(9) <sup>71</sup>   | 3.53(3)  | C(11) | H(11) <sup>71</sup>  | 3.26(3)  |
| C(11) | H(23) <sup>51</sup>  | 3.41(4)  | C(11) | H(25) <sup>61</sup>  | 2.98(4)  |
| C(12) | H(27) <sup>41</sup>  | 3.19(3)  | C(13) | H(4) <sup>11</sup>   | 3.48(3)  |
| C(14) | O(1) <sup>41</sup>   | 3.540(6) | C(14) | C(31) <sup>41</sup>  | 3.523(8) |
| C(14) | H(27) <sup>41</sup>  | 2.88(3)  | C(14) | H(28) <sup>41</sup>  | 3.53(4)  |
| C(15) | Br(1) <sup>11</sup>  | 3.441(5) | C(17) | H(1) <sup>51</sup>   | 3.13(2)  |
| C(17) | H(3) <sup>21</sup>   | 3.52(3)  | C(17) | H(15) <sup>81</sup>  | 3.16(4)  |
| C(17) | H(16) <sup>81</sup>  | 3.56(2)  | C(17) | H(23) <sup>51</sup>  | 2.98(4)  |
| C(19) | C(11) <sup>51</sup>  | 3.385(7) | C(19) | H(6) <sup>51</sup>   | 3.10(2)  |
| C(19) | H(26) <sup>21</sup>  | 3.21(4)  | C(19) | H(30) <sup>21</sup>  | 3.15(5)  |
| C(20) | H(23) <sup>51</sup>  | 3.43(4)  | C(20) | H(28) <sup>41</sup>  | 3.59(4)  |
| C(20) | H(29) <sup>71</sup>  | 3.34(4)  | C(20) | H(30) <sup>71</sup>  | 3.38(5)  |
| C(21) | H(4) <sup>11</sup>   | 3.53(3)  | C(21) | H(28) <sup>91</sup>  | 3.11(4)  |
| C(23) | H(7) <sup>101</sup>  | 3.49(2)  | C(23) | H(8) <sup>101</sup>  | 3.47(2)  |
| C(23) | H(13) <sup>111</sup> | 3.45(3)  | C(23) | H(22) <sup>101</sup> | 3.53(3)  |
| C(25) | N(2) <sup>101</sup>  | 3.379(7) | C(25) | H(6) <sup>101</sup>  | 3.51(2)  |
| C(25) | H(26) <sup>101</sup> | 3.47(3)  | C(26) | H(11) <sup>11</sup>  | 3.29(3)  |
| C(26) | H(14) <sup>11</sup>  | 3.55(3)  | C(27) | H(14) <sup>11</sup>  | 3.45(3)  |
| C(27) | H(19) <sup>61</sup>  | 3.59(3)  | C(28) | H(30) <sup>21</sup>  | 2.94(5)  |
| C(29) | H(19) <sup>51</sup>  | 3.45(3)  | C(29) | H(20) <sup>51</sup>  | 3.59(2)  |

Table 6. Distances beyond the asymmetric unit out to 3.60 Å (continued)

| atom  | atom                 | distance | atom  | atom                 | distance |
|-------|----------------------|----------|-------|----------------------|----------|
| C(30) | H(1) <sup>5)</sup>   | 3.26(2)  | C(30) | H(15) <sup>8)</sup>  | 3.23(4)  |
| C(30) | H(16) <sup>8)</sup>  | 3.45(2)  | C(30) | H(17) <sup>8)</sup>  | 3.32(2)  |
| C(30) | H(23) <sup>5)</sup>  | 3.01(4)  | C(31) | C(14) <sup>4)</sup>  | 3.523(8) |
| C(31) | H(17) <sup>4)</sup>  | 3.37(2)  | C(31) | H(20) <sup>12)</sup> | 3.33(3)  |
| C(31) | H(21) <sup>4)</sup>  | 3.24(3)  | C(31) | H(22) <sup>12)</sup> | 3.39(3)  |
| C(32) | H(11) <sup>7)</sup>  | 3.53(2)  | C(33) | C(11) <sup>2)</sup>  | 3.570(8) |
| C(33) | H(6) <sup>2)</sup>   | 3.51(2)  | C(33) | H(11) <sup>1)</sup>  | 3.36(3)  |
| C(33) | H(26) <sup>2)</sup>  | 3.38(3)  | C(35) | H(13) <sup>11)</sup> | 3.45(3)  |
| C(35) | H(15) <sup>11)</sup> | 3.58(4)  | C(35) | H(20) <sup>12)</sup> | 3.60(3)  |
| H(1)  | Br(1) <sup>6)</sup>  | 3.37(3)  | H(1)  | C(17) <sup>5)</sup>  | 3.13(2)  |
| H(1)  | C(30) <sup>5)</sup>  | 3.26(2)  | H(1)  | H(18) <sup>6)</sup>  | 3.57(4)  |
| H(1)  | H(19) <sup>5)</sup>  | 2.72(4)  | H(1)  | H(20) <sup>5)</sup>  | 3.02(4)  |
| H(2)  | N(1) <sup>5)</sup>   | 3.56(3)  | H(2)  | N(2) <sup>5)</sup>   | 2.85(2)  |
| H(2)  | C(11) <sup>5)</sup>  | 2.66(3)  | H(2)  | H(6) <sup>5)</sup>   | 2.37(4)  |
| H(2)  | H(9) <sup>2)</sup>   | 2.86(4)  | H(2)  | H(26) <sup>2)</sup>  | 3.15(5)  |
| H(2)  | H(30) <sup>2)</sup>  | 3.14(6)  | H(3)  | Br(1) <sup>6)</sup>  | 3.38(3)  |
| H(3)  | C(10) <sup>6)</sup>  | 3.33(3)  | H(3)  | C(17) <sup>6)</sup>  | 3.52(3)  |
| H(3)  | H(18) <sup>6)</sup>  | 2.77(5)  | H(3)  | H(19) <sup>6)</sup>  | 3.14(5)  |
| H(3)  | H(25) <sup>6)</sup>  | 3.25(5)  | H(4)  | Br(1) <sup>1)</sup>  | 2.92(2)  |
| H(4)  | C(13) <sup>1)</sup>  | 3.48(3)  | H(4)  | C(21) <sup>1)</sup>  | 3.53(3)  |
| H(4)  | H(12) <sup>1)</sup>  | 3.38(4)  | H(4)  | H(14) <sup>1)</sup>  | 2.65(4)  |
| H(4)  | H(15) <sup>1)</sup>  | 3.40(5)  | H(4)  | H(19) <sup>6)</sup>  | 3.10(4)  |
| H(5)  | Br(1)                | 2.94(2)  | H(5)  | Br(1) <sup>1)</sup>  | 3.21(2)  |
| H(5)  | H(5) <sup>1)</sup>   | 3.53(3)  | H(6)  | Br(1) <sup>6)</sup>  | 2.94(2)  |
| H(6)  | C(19) <sup>5)</sup>  | 3.10(2)  | H(6)  | C(25) <sup>7)</sup>  | 3.51(2)  |
| H(6)  | C(33) <sup>6)</sup>  | 3.51(2)  | H(6)  | H(2) <sup>5)</sup>   | 2.37(4)  |
| H(6)  | H(9) <sup>7)</sup>   | 3.08(4)  | H(6)  | H(11) <sup>7)</sup>  | 3.01(3)  |
| H(6)  | H(24) <sup>6)</sup>  | 3.48(3)  | H(6)  | H(25) <sup>6)</sup>  | 2.98(4)  |
| H(7)  | C(23) <sup>7)</sup>  | 3.49(2)  | H(7)  | H(10) <sup>7)</sup>  | 2.88(4)  |
| H(7)  | H(11) <sup>7)</sup>  | 3.40(4)  | H(7)  | H(29) <sup>7)</sup>  | 3.48(5)  |
| H(8)  | O(1) <sup>4)</sup>   | 3.42(2)  | H(8)  | C(23) <sup>7)</sup>  | 3.47(2)  |
| H(8)  | H(17) <sup>4)</sup>  | 3.52(3)  | H(8)  | H(29) <sup>7)</sup>  | 3.16(5)  |
| H(9)  | Br(1) <sup>1)</sup>  | 3.31(3)  | H(9)  | N(2) <sup>10)</sup>  | 3.24(3)  |
| H(9)  | C(11) <sup>10)</sup> | 3.53(3)  | H(9)  | H(2) <sup>6)</sup>   | 2.86(4)  |
| H(9)  | H(6) <sup>10)</sup>  | 3.08(4)  | H(10) | N(2) <sup>10)</sup>  | 3.37(4)  |
| H(10) | H(7) <sup>10)</sup>  | 2.88(4)  | H(10) | H(26) <sup>10)</sup> | 3.32(5)  |
| H(11) | N(2) <sup>10)</sup>  | 2.80(3)  | H(11) | C(11) <sup>10)</sup> | 3.26(3)  |

Table 6. Distances beyond the asymmetric unit out to 3.60 Å (continued)

| atom  | atom                | distance | atom  | atom                | distance |
|-------|---------------------|----------|-------|---------------------|----------|
| H(11) | C(26) <sup>11</sup> | 3.29(3)  | H(11) | C(32) <sup>10</sup> | 3.53(2)  |
| H(11) | C(33) <sup>11</sup> | 3.36(3)  | H(11) | H(6) <sup>10</sup>  | 3.01(3)  |
| H(11) | H(7) <sup>10</sup>  | 3.40(4)  | H(11) | H(24) <sup>11</sup> | 3.17(4)  |
| H(11) | H(25) <sup>11</sup> | 3.55(5)  | H(11) | H(26) <sup>10</sup> | 2.75(4)  |
| H(12) | C(7) <sup>11</sup>  | 3.42(4)  | H(12) | H(4) <sup>11</sup>  | 3.38(4)  |
| H(12) | H(26) <sup>10</sup> | 3.30(5)  | H(12) | H(28) <sup>9</sup>  | 3.02(5)  |
| H(12) | H(30) <sup>10</sup> | 3.44(6)  | H(13) | C(23) <sup>9</sup>  | 3.45(3)  |
| H(13) | C(35) <sup>9</sup>  | 3.45(3)  | H(13) | H(28) <sup>9</sup>  | 2.92(5)  |
| H(13) | H(29) <sup>9</sup>  | 2.84(5)  | H(14) | C(26) <sup>11</sup> | 3.55(3)  |
| H(14) | C(27) <sup>11</sup> | 3.45(3)  | H(14) | H(4) <sup>11</sup>  | 2.65(4)  |
| H(14) | H(24) <sup>11</sup> | 3.22(4)  | H(15) | C(17) <sup>3</sup>  | 3.16(4)  |
| H(15) | C(30) <sup>3</sup>  | 3.23(4)  | H(15) | C(35) <sup>9</sup>  | 3.58(4)  |
| H(15) | H(4) <sup>11</sup>  | 3.40(5)  | H(15) | H(19) <sup>3</sup>  | 3.05(5)  |
| H(15) | H(20) <sup>3</sup>  | 3.24(5)  | H(15) | H(28) <sup>9</sup>  | 2.77(5)  |
| H(16) | Br(1)               | 3.13(2)  | H(16) | C(17) <sup>3</sup>  | 3.56(2)  |
| H(16) | C(30) <sup>3</sup>  | 3.45(2)  | H(16) | H(19) <sup>3</sup>  | 3.01(4)  |
| H(16) | H(20) <sup>3</sup>  | 2.86(3)  | H(17) | C(30) <sup>3</sup>  | 3.32(2)  |
| H(17) | C(31) <sup>4</sup>  | 3.37(2)  | H(17) | H(8) <sup>4</sup>   | 3.52(3)  |
| H(17) | H(20) <sup>3</sup>  | 2.67(3)  | H(17) | H(27) <sup>4</sup>  | 2.55(4)  |
| H(18) | Br(1)               | 3.10(3)  | H(18) | H(1) <sup>2</sup>   | 3.57(4)  |
| H(18) | H(3) <sup>2</sup>   | 2.77(5)  | H(19) | Br(1) <sup>8</sup>  | 3.19(3)  |
| H(19) | C(27) <sup>2</sup>  | 3.59(3)  | H(19) | C(29) <sup>5</sup>  | 3.45(3)  |
| H(19) | H(1) <sup>5</sup>   | 2.72(4)  | H(19) | H(3) <sup>2</sup>   | 3.14(5)  |
| H(19) | H(4) <sup>2</sup>   | 3.10(4)  | H(19) | H(15) <sup>8</sup>  | 3.05(5)  |
| H(19) | H(16) <sup>8</sup>  | 3.01(4)  | H(19) | H(23) <sup>5</sup>  | 3.25(5)  |
| H(20) | C(6) <sup>8</sup>   | 3.21(2)  | H(20) | C(29) <sup>5</sup>  | 3.59(2)  |
| H(20) | C(31) <sup>13</sup> | 3.33(3)  | H(20) | C(35) <sup>13</sup> | 3.60(3)  |
| H(20) | H(1) <sup>5</sup>   | 3.02(4)  | H(20) | H(15) <sup>8</sup>  | 3.24(5)  |
| H(20) | H(16) <sup>8</sup>  | 2.86(3)  | H(20) | H(17) <sup>8</sup>  | 2.67(3)  |
| H(20) | H(23) <sup>5</sup>  | 3.32(5)  | H(20) | H(27) <sup>13</sup> | 3.03(4)  |
| H(20) | H(28) <sup>13</sup> | 3.35(5)  | H(21) | O(1) <sup>4</sup>   | 2.67(3)  |
| H(21) | C(31) <sup>4</sup>  | 3.24(3)  | H(21) | H(27) <sup>4</sup>  | 2.56(4)  |
| H(22) | C(23) <sup>7</sup>  | 3.53(3)  | H(22) | C(31) <sup>13</sup> | 3.39(3)  |
| H(22) | H(27) <sup>13</sup> | 3.53(4)  | H(22) | H(29) <sup>7</sup>  | 2.79(5)  |
| H(22) | H(30) <sup>7</sup>  | 3.17(6)  | H(23) | N(2) <sup>5</sup>   | 3.49(4)  |
| H(23) | C(10) <sup>5</sup>  | 3.39(4)  | H(23) | C(11) <sup>5</sup>  | 3.41(4)  |
| H(23) | C(17) <sup>5</sup>  | 2.98(4)  | H(23) | C(20) <sup>5</sup>  | 3.43(4)  |

Table 6. Distances beyond the asymmetric unit out to 3.60 Å (continued)

| atom  | atom                 | distance | atom  | atom                 | distance |
|-------|----------------------|----------|-------|----------------------|----------|
| H(23) | C(30) <sup>5j</sup>  | 3.01(4)  | H(23) | H(19) <sup>5j</sup>  | 3.25(5)  |
| H(23) | H(20) <sup>5j</sup>  | 3.32(5)  | H(23) | H(30) <sup>2j</sup>  | 2.69(7)  |
| H(24) | Br(1)                | 2.98(2)  | H(24) | H(6) <sup>2j</sup>   | 3.48(3)  |
| H(24) | H(11) <sup>1j</sup>  | 3.17(4)  | H(24) | H(14) <sup>1j</sup>  | 3.22(4)  |
| H(25) | Br(1) <sup>8j</sup>  | 3.28(4)  | H(25) | N(1) <sup>2j</sup>   | 3.26(3)  |
| H(25) | N(2) <sup>2j</sup>   | 3.42(4)  | H(25) | C(11) <sup>2j</sup>  | 2.98(4)  |
| H(25) | H(3) <sup>2j</sup>   | 3.25(5)  | H(25) | H(6) <sup>2j</sup>   | 2.98(4)  |
| H(25) | H(11) <sup>1j</sup>  | 3.55(5)  | H(26) | C(19) <sup>6j</sup>  | 3.21(4)  |
| H(26) | C(25) <sup>7j</sup>  | 3.47(3)  | H(26) | C(33) <sup>6j</sup>  | 3.38(3)  |
| H(26) | H(2) <sup>6j</sup>   | 3.15(5)  | H(26) | H(10) <sup>7j</sup>  | 3.32(5)  |
| H(26) | H(11) <sup>7j</sup>  | 2.75(4)  | H(26) | H(12) <sup>7j</sup>  | 3.30(5)  |
| H(27) | C(6) <sup>4j</sup>   | 3.30(3)  | H(27) | C(12) <sup>4j</sup>  | 3.19(3)  |
| H(27) | C(14) <sup>4j</sup>  | 2.88(3)  | H(27) | H(17) <sup>4j</sup>  | 2.55(4)  |
| H(27) | H(20) <sup>12j</sup> | 3.03(4)  | H(27) | H(21) <sup>4j</sup>  | 2.56(4)  |
| H(27) | H(22) <sup>12j</sup> | 3.53(4)  | H(28) | C(14) <sup>4j</sup>  | 3.53(4)  |
| H(28) | C(20) <sup>4j</sup>  | 3.59(4)  | H(28) | C(21) <sup>11j</sup> | 3.11(4)  |
| H(28) | H(12) <sup>11j</sup> | 3.02(5)  | H(28) | H(13) <sup>11j</sup> | 2.92(5)  |
| H(28) | H(15) <sup>11j</sup> | 2.77(5)  | H(28) | H(20) <sup>12j</sup> | 3.35(5)  |
| H(29) | C(20) <sup>10j</sup> | 3.34(4)  | H(29) | H(7) <sup>10j</sup>  | 3.48(5)  |
| H(29) | H(8) <sup>10j</sup>  | 3.16(5)  | H(29) | H(13) <sup>11j</sup> | 2.84(5)  |
| H(29) | H(22) <sup>10j</sup> | 2.79(5)  | H(30) | C(19) <sup>6j</sup>  | 3.15(5)  |
| H(30) | C(20) <sup>10j</sup> | 3.38(5)  | H(30) | C(28) <sup>6j</sup>  | 2.94(5)  |
| H(30) | H(2) <sup>6j</sup>   | 3.14(6)  | H(30) | H(12) <sup>7j</sup>  | 3.44(6)  |
| H(30) | H(22) <sup>10j</sup> | 3.17(6)  | H(30) | H(23) <sup>6j</sup>  | 2.69(7)  |

Symmetry Operators:

- |                           |                        |
|---------------------------|------------------------|
| (1) -X+1,-Y,-Z            | (2) -X+1/2,Y+1/2-1,-Z  |
| (3) X+1/2,-Y+1/2-1,Z      | (4) -X+1,-Y,-Z+1       |
| (5) -X,-Y,-Z              | (6) -X+1/2,Y+1/2,-Z    |
| (7) X+1/2-1,-Y+1/2,Z      | (8) X+1/2-1,-Y+1/2-1,Z |
| (9) -X+1/2+1,Y+1/2-1,-Z+1 | (10) X+1/2,-Y+1/2,Z    |
| (11) -X+1/2+1,Y+1/2,-Z+1  | (12) -X+1/2,Y+1/2,-Z+1 |
| (13) -X+1/2,Y+1/2-1,-Z+1  |                        |
